# Supplementary material for: Multilayer Ti3C2Tx MXene electrode decorated with polypyridine for efficient symmetric supercapacitors
Source: Royal Society of Chemistry journal article supplement (doi:10.1039/d4se00892h), 2024-01-01
Supplement: d4se00892h1.pdf [file d4se00892h1.pdf]

## Supporting Information

### Multilayer $\text{Ti}_3\text{C}_2\text{T}_x$ MXene Electrode Decorated with Polypyridine for Efficient Symmetric Supercapacitor

Peng Lin,<sup>1</sup> Sibowang,<sup>1</sup> Ailing Liu,<sup>1</sup> Ting Yi,<sup>2</sup> Fei Su,<sup>1,\*</sup> Hui Wang,<sup>1</sup> Song Xue<sup>1</sup> and  
Xueping Zong<sup>1,\*</sup>

- <sup>1.</sup> *School of Integrated Circuit Science and Engineering, Tianjin Key Laboratory of Organic Solar Cells and Photochemical Conversion, School of Chemistry and Chemical Engineering, Tianjin University of Technology, Tianjin 300384, China.*
- <sup>2.</sup> *Institute of New Energy Power battery and Energy Storage Technology, College of Automotive Engineering, Yancheng Institute of Technology, Yancheng, Jiangsu 224051, China.*

*Corresponding author:*

E-mail: 710921599@qq.com;

E-mail: xp\_zong@email.tjut.edu.cn.

## **1. Characterizations of materials**

X-ray diffraction (XRD) characterization was conducted utilizing a Bruker D8 X-ray diffractometer (Bruker D8 Advance diffractometer, Germany). The microstructure and morphology were recorded on Gemini SEM 300 and Dimension ICON SPM. X-ray diffraction was used to evaluate crystal structures using Mini Flex 600 (Rigaku, Japan). XPS spectra were determined using a monochromatic AL-Ka (1486.6 eV) radiation source (Shimadzu, Axis Suora). The specific surface areas (Brunnauer-Emmett-Teller) was calculated using N<sub>2</sub> gas adsorption isotherms.

## **2. Electrochemical measurements**

All electrochemical tests, including Cyclic voltammetry (CV), galvanostatic charge-discharge (GCD) and the electrochemical impedance spectroscopy (EIS) tests, were studied by CHI 660E electrochemical workstation (Shanghai Chenhua) with 1M H<sub>2</sub>SO<sub>4</sub> at room temperature. Three-electrode measurement system was conducted with as-prepared electrode (working electrode), platinum (counter electrode) and saturated calomel electrode (Ag/AgCl in saturated KCl). The working electrode was prepared by mixing the active materials with acetylene black and polytetrafluoroethylene (8:1:1 in mass ratio) in N, N-dimethylformamide to form a slurry, which was coated on the carbon foam collector (1 cm × 1 cm) and dried at 60 °C for 24 h in a vacuum oven.

## **3. Figures**

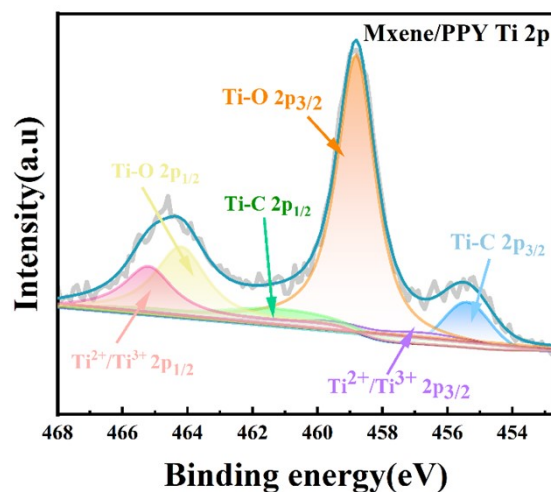

**Figure S1.** XPS spectra for MXene/PPY, high resolution XPS spectra of Ti 2p.

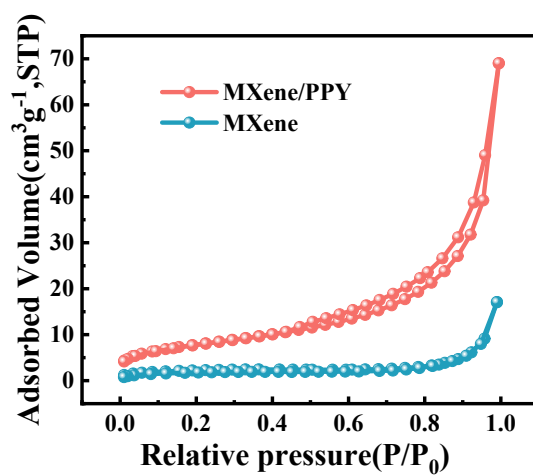

**Figure S2.** N<sub>2</sub> adsorption-desorption isotherms of MXene and PPY/MXene composite.

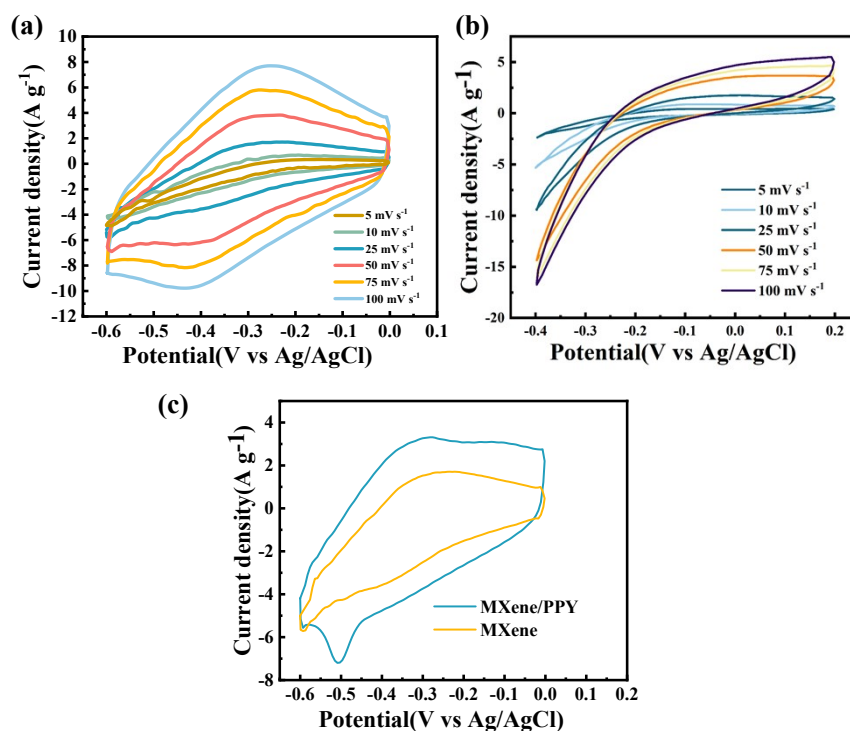

**Figure S3.** CV curves of pristine MXene (a) and pristine PPY (b) at the scan rate from 5 mV s<sup>-1</sup> to 100 mV s<sup>-1</sup>; (c) Comparison of CV curves for MXene and MXene/PPY at a scan rate of 25 mV s<sup>-1</sup>.

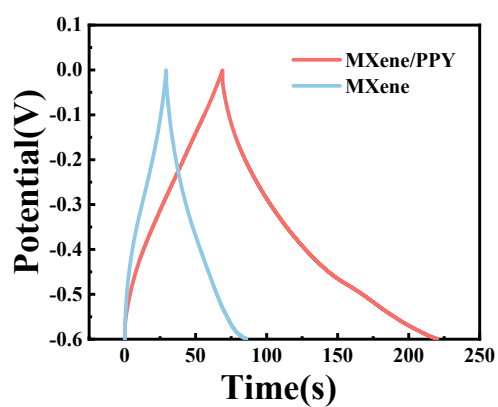

**Figure S4.** GCD plots of pristine MXene and MXene/PPY composite.

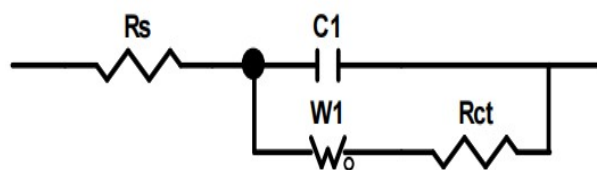

**Figure S5.** Equivalent circuit.

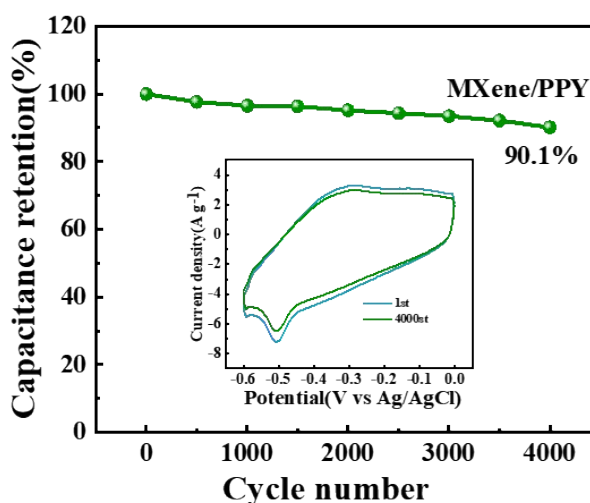

**Figure S6.** Cyclic stability of MXene/PPY at 25 mV s<sup>-1</sup>. The inset image represents the CV curves of PPY/MXene electrode before and after 4000 charge and discharge cycles.

## 4. Tables

**Table S1.** Fitted data of Nyquist plot

| Parameter | R    | C <sub>1</sub> | R <sub>2</sub> | W <sub>1</sub> -R | W <sub>1</sub> -T | W <sub>1</sub> -P |
|-----------|------|----------------|----------------|-------------------|-------------------|-------------------|
|           | 1.35 | 0.0023815      | 0.38037        | 3.639             | 0.36558           | 0.47427           |

**Table S2.** The comparison of supercapacitor electrochemical performance

| Cathode Material                       | Negative Material                      | Electrolyte                           | Pd [W/kg] | Wd [Wh/kg] | Ref              |
|----------------------------------------|----------------------------------------|---------------------------------------|-----------|------------|------------------|
| Ti <sub>3</sub> CN                     | Ti <sub>3</sub> CN                     | 2 M KOH                               | 500       | 5.7        | Ref <sup>1</sup> |
| Ti <sub>3</sub> CNT <sub>x</sub>       | rGO                                    | 2 M H <sub>2</sub> SO <sub>4</sub>    | 154       | 5          | Ref <sup>2</sup> |
| GAC-2                                  | GAC-2                                  | 1 M H <sub>2</sub> SO <sub>4</sub>    | 3500      | 14.4       | Ref <sup>3</sup> |
| PPy/Ti <sub>3</sub> C <sub>2</sub> -S2 | PPy/Ti <sub>3</sub> C <sub>2</sub> -S2 | 3.5 M KCl                             | 499.94    | 21.61      | Ref <sup>4</sup> |
| Graphene/MnO <sub>2</sub>              | Graphene/MnO <sub>2</sub>              | 0.5 M Na <sub>2</sub> SO <sub>4</sub> | 62        | 6.2        | Ref <sup>5</sup> |

## 5. References

- (1) Ashraf, I.; Ahmad, S.; Dastan, D.; Shi, Z.; Iqbal, M. Delaminated titanium carbonitride MXene (d-Ti<sub>3</sub>CN) based symmetric supercapacitor (SSC) device fabrication with excellent capacitance and cyclic stability. *Inorganic Chemistry Communications* **2024**, *161*, 112059.
- (2) Xu, S.; Yan, S.; Chen, X.; Huang, H.; Liang, X.; Wang, Y.; Hu, Q.; Wei, G.; Yang, Y. Vertical porous Ti<sub>3</sub>CNT<sub>x</sub>/rGO hybrid aerogels with enhanced capacitive performance. *Chemical Engineering Journal* **2023**, *459*, 141528.
- (3) Ran, J.; Liu, Y.; Feng, H.; Shi, H.; Ma, Q. A review on graphene-based electrode materials for supercapacitor. *Journal of Industrial and Engineering Chemistry* **2024**, DOI:<https://doi.org/10.1016/j.jiec.2024.03.043>.
- (4) Wei, D.; Wu, W.; Zhu, J.; Wang, C.; Zhao, C.; Wang, L. A facile strategy of polypyrrole nanospheres grown on Ti<sub>3</sub>C<sub>2</sub>-MXene nanosheets as advanced supercapacitor electrodes. *Journal of Electroanalytical Chemistry* **2020**, *877*, 114538.
- (5) He, Y.; Chen, W.; Li, X.; Zhang, Z.; Fu, J.; Zhao, C.; Xie, E. Freestanding Three-Dimensional Graphene/MnO<sub>2</sub> Composite Networks As Ultralight and Flexible Supercapacitor Electrodes. *ACS Nano* **2013**, *7* (1), 174.
